# Supplementary material for: Cerebrospinal Fluid IgM and Oligoclonal IgG Bands in Multiple Sclerosis: A Meta-Analysis of Prevalence and Prognosis
Source: MDPI journal article supplement (doi:10.3390/brainsci11111444), 2021-10-29
Supplement: s1 [file s1]

| Reference                                                                                                                                                                                                                              | Study design               | Follow-up | ITMS detection | Cases and sample size (mean age)                  | McDonald Criteria | Main clinical Outcome(s)                                                                                                     | Results                                                                                                                                                                                                                                                                                                                                                                                                                                                                                                                                                             |
|----------------------------------------------------------------------------------------------------------------------------------------------------------------------------------------------------------------------------------------|----------------------------|-----------|----------------|---------------------------------------------------|-------------------|------------------------------------------------------------------------------------------------------------------------------|---------------------------------------------------------------------------------------------------------------------------------------------------------------------------------------------------------------------------------------------------------------------------------------------------------------------------------------------------------------------------------------------------------------------------------------------------------------------------------------------------------------------------------------------------------------------|
| Abdelhak A, et al. <i>CSF profile in primary progressive multiple sclerosis: Re-exploring the basics</i> . PLoS One 2017                                                                                                               | Retrospective cohort study | 27 mo     | IgMLoc         | 176 PPMS (47)                                     | 2010              | Yearly progression rate                                                                                                      | In patients with ITMS, a negative correlation was found between IgMloc and yearly progression rate ( $p = -0.4$ , $p = 0.03$ , $n = 28$ ).                                                                                                                                                                                                                                                                                                                                                                                                                          |
| Berek K, et al. <i>Cerebrospinal Fluid Findings in 541 patients with Clinically Isolated Syndrome and Multiple Sclerosis: A Monocentric Study</i> . Front Immunol 2021                                                                 | Retrospective cohort study | 9 Yr      | IgMLoc         | 80 CIS, 240 McDonald MS**, 155 RRMS, 43 PPMS (34) | 2017              | To assess routine CSF parameters in MS patients and the frequency of pathologic findings by applying novel reference limits. | In patients with LP at the first relapse, elevation of WBC count [odds ratio (OR) 2.9, 5% CI: 1.0 – 8.2, $p=0.049$ ] as well as the presence of monocytes/macrophages in CSF cytology (OR 7.3, 95% CI: 1.4 – 38.2, $p=0.018$ ) were predictive for the occurrence of a second clinical relapse during follow-up. Blood-CSF-barrier dysfunction and intrathecal IgA/IgM synthesis are less frequent when the novel reference limits are applied.                                                                                                                     |
| Bosca I, et al. <i>Response to interferon in multiple sclerosis is related to lipid-specific oligoclonal IgM bands</i> . Mult Scler 2010                                                                                               | Prospective cohort study   | 37 mo     | LS-OCMBs       | 102 RRMS (33)                                     | 2005              | Time to first relapse after IFN $\beta$ , relapse rate, relapse rate reduction, proportion of relapse-free pts               | LS-OCMBs increased the risk of second relapse (HR = 2.0, 95% CI 1.2-3.5, $p = 0.01$ ). LS-OCMBs patients showed lower reduction in relapse rate (51.8% versus 80.8%; $p<0.0001$ ), higher relapse rate in the first year (0.8 versus 0.2; $p < 0.001$ ), and lower proportion of relapse-free patients (25% versus 61.3%; $p < 0.003$ ).                                                                                                                                                                                                                            |
| Boscá I, et al. <i>The risk of relapse after a clinically isolated syndrome is related to the pattern of oligoclonal bands</i> . J Neuroimmunol 2010                                                                                   | Prospective cohort study   | 6,7 Yr    | LS-OCMBs       | 192 CIS (32)                                      | NS                | Time to second relapse (determining a CDMS)                                                                                  | Kaplan–Meier survival analysis showed that the median time from the onset of CIS to the second relapse was 0.7 years when both OCGBs and LS-OCMBs were present, 3.3 years when OCGBs were present but LS-OCMBs were absent (95% CI 2.6 to 4.0) and 9.9 years when both types of oligoclonal bands were absent. Kaplan–Meier log rank was 124.6 with $p<0.001$ . Considering only patients with OCGBs ( $n=143$ ), the risk of having a new relapse was significantly higher for patients with additional LS-OCMBs in the CSF (HR 4.4, 95%CI 2.8-6.9, $p < 0.0001$ ) |
| Calabrese M, et al. <i>The association of intrathecal immunoglobulin synthesis and cortical lesions predicts disease activity in clinically isolated syndrome and early relapsing-remitting multiple sclerosis</i> . Mult Scler J 2012 | Retrospective cohort study | 3 Yr      | IgM Loc        | 46 CIS, 40 RRMS (32)                              | 2005              | Conversion to CDMS, number of new relapses, EDSS worsening, new T2 white matter lesions, new cortical lesions                | Mean number of CLs was higher in IgMloc positive (7.24.5, range: 0–14) than negative patients (2.02.5, range: 0–6 $p < 0.001$ ). Risk of conversion to CDMS was higher for IgMloc positive patients (RR 1.8; 95% CI 1.1–2.8; $p < 0.05$ ). IgMloc predicted new clinical or MRI disease activity (RR 1.5; 95% CI 1.2–1.9; $p < 0.05$ ).                                                                                                                                                                                                                             |

|                                                                                                                                                                                                           |                             |        |                  |                                 |                                |                                                       |                                                                                                                                                                                                                                                                                                                                                                                                                                                                                                                                 |
|-----------------------------------------------------------------------------------------------------------------------------------------------------------------------------------------------------------|-----------------------------|--------|------------------|---------------------------------|--------------------------------|-------------------------------------------------------|---------------------------------------------------------------------------------------------------------------------------------------------------------------------------------------------------------------------------------------------------------------------------------------------------------------------------------------------------------------------------------------------------------------------------------------------------------------------------------------------------------------------------------|
| Capuano R, et al. <i>Oligoclonal IgM bands in the cerebrospinal fluid of patients with relapsing MS to inform long-term MS disability</i> . Mult Scler J 2021                                             | Prospective cohort study    | 9,6 Yr | OCMBs / LS-OCMBs | 89 RRMS (33)                    | 2010/2017                      | Time to EDSS 3.0 / EDSS 4.0                           | OCMBs were associated with a 33% increase in the annualized relapse rate (ARR; $p = 0.06$ ), higher odds for high-efficacy DMDs use (OR = 4.8; 95% CI = (1.5, 16.1)), thinner pRNFL ( $\beta = -4.4$ ; 95% CI = (-8.6, -0.2)) and GCIPL ( $\beta = -2.9$ ; 95% CI = (-5.9, +0.05)), and higher hazard ratios of EDSS $\geq 3.0$ (HR = 4.4; 95% CI = (1.6, 11.8)) and EDSS $\geq 4.0$ (HR = 5.4; 95% CI = (1.1, 27.1)).                                                                                                          |
| Casanova B, et al. <i>Different clinical response to interferon beta and glatiramer acetate related to the presence of oligoclonal IgM bands in CSF in multiple sclerosis patients</i> . Neurol Sci 2018  | Retrospective cohort study  | 41 Mo  | OCMBs            | 256 RRMS (32)                   | 2005                           | Time to second relapse after having started IFN or GA | 54.7% of patients remained free from further relapses (RF). The proportion of RF patients was higher in the GA group than in the IFN $\beta$ group (72.2 vs. 40.4%, $p < 0.001$ ). The IFN $\beta$ patients with OCMB presented the poorest response, 31.3% RF vs. 48.1% in IFN $\beta$ without OCMB ( $p = 0.03$ ). The highest risk of relapse after treatment was for patients with OCMB in CSF and receiving IFN $\beta$ treatment, followed by patients without OCMB and receiving IFN $\beta$ treatment ( $p = 0.0001$ ). |
| Ferraro D, et al. <i>Cerebrospinal fluid oligoclonal IgM bands predict early conversion to clinically definite multiple sclerosis in patients with Clinically Isolated Syndrome</i> . J Neuroimmunol 2013 | Retrospective cohort study  | 102 Mo | OCMBs            | 205 CIS (32)                    | NR (First demyelinating event) | Time to second relapse                                | At survival analysis, a lower age at onset, an onset with optic neuritis and the presence of OCMBs increased the risk of a second relapse. Only the presence of OCMBs predicted a relapse within one year (1.5 (1.0-2.2 $p = 0.043$ )). Median time to second relapse: 20 months in OCMB+ patients, 35 months in OCMB- patients.                                                                                                                                                                                                |
| Ferraro D, et al. <i>Cerebrospinal fluid CXCL13 in clinically isolated syndrome patients: Association with oligoclonal IgM bands and prediction of multiple sclerosis diagnosis</i> . J Neuroimmunol 2015 | Retrospective cohort study  | 41 mo  | OCMBs            | 110 CIS (35)                    | 2010                           | Time to CDMS (clinical or radiological)               | An elevated CSF cell count (HR: 1.04; $p = 0.006$ ), a positive baseline MRI (defined by the presence of at least one lesion on T2-weighted images) (HR: 5; $p = 0.029$ ), a positive baseline spinal cord MRI (HR: 1.7; $p = 0.017$ ) and CSF CXCL13 levels $\geq 15.4$ pg/ml increased the risk of MS diagnosis (HR: 3; $p = 0.001$ ). Rate of conversion to CDMS between OCMBs positive and negative patients was similar (OR = 0.6, $p = 0.275$ ).                                                                          |
| Fonderico M. et al. <i>Prognostic role of intrathecal IgM synthesis in multiple sclerosis: Results from a clinical series</i> . Mult Scler J 2020                                                         | Prospectively acquired data | 2.9 Yr | IgM Loc          | 6 CIS, 52 RRMS and 10 PPMS (37) | 2017                           | Time to second relapse                                | RRMS patients with ITMS were at higher risk of experiencing a second clinical relapse (adjusted hazard ratio (aHR) = 6.3, 95% confidence interval (CI) = 2.1–18.4, $p = 0.001$ ) and had a high T1 lesion load ( $p < 0.05$ ).                                                                                                                                                                                                                                                                                                  |
| Frau J, et al. <i>Intrathecal oligoclonal bands synthesis in multiple sclerosis: is it always a prognostic factor?</i> J Neurol 2018                                                                      | Retrospective cohort study  | 6 Yr   | OCMBs            | 479 RRMS and 24 PPMS (38)       | 2010                           | Time to EDSS 3.0 and EDSS 4.0                         | Cox regression showed that higher age at onset (HR = 1.04, 95% CI 1.02-1.07, $p < 0.005$ ) and clinical course PP (HR = 2.8, 95% CI 1.5-5.2, $p = 0.001$ ) conferred an increased risk of reaching EDSS 3.0. The presence of                                                                                                                                                                                                                                                                                                    |

|                                                                                                                                                                                                             |                             |          |          |                                 |                                |                                                                                                                                                                                                |                                                                                                                                                                                                                                                                                                                                                                                                                    |
|-------------------------------------------------------------------------------------------------------------------------------------------------------------------------------------------------------------|-----------------------------|----------|----------|---------------------------------|--------------------------------|------------------------------------------------------------------------------------------------------------------------------------------------------------------------------------------------|--------------------------------------------------------------------------------------------------------------------------------------------------------------------------------------------------------------------------------------------------------------------------------------------------------------------------------------------------------------------------------------------------------------------|
|                                                                                                                                                                                                             |                             |          |          |                                 |                                |                                                                                                                                                                                                | OCMBs and OCGBs did not increase the risk of EDSS 3.0/4.0.                                                                                                                                                                                                                                                                                                                                                         |
| García-Barragán N, et al. <i>Multiple sclerosis patients with anti-lipid oligoclonal IgM show early favourable response to immunomodulatory treatment.</i> Eur J Neurol 2009                                | Prospective cohort study    | 70, 5 Mo | LS-OCMBs | 75 CIS (32)                     | NR (first demyelinating event) | EDSS progression and percentage of treated patients during follow-up.                                                                                                                          | Immunomodulatory treatments (IT) similarly reduced relapse rate in both treated groups ( $P < 0.0001$ ) and reduced EDSS progression in LS-OCMBs+ patients, whose EDSS score had significantly increased before treatment.                                                                                                                                                                                         |
| Gasperi C, et al. <i>Association of Intrathecal Immunoglobulin G Synthesis with Disability Worsening in Multiple Sclerosis.</i> JAMA Neurol 2019                                                            | Prospectively acquired data | 4 Yr     | IgM Loc  | 319 CIS and 354 RRMS (34)       | 2005                           | Risk of EDSS worsening after 4 years (see main Text)                                                                                                                                           | Intrathecal IgG synthesis was associated with a higher risk of EDSS worsening after 4 years (odds ratio, 2.02 [95% CI, 1.15-3.58]; $P = .01$ ), independent of the occurrence of relapses and disease-modifying therapy. No association of other routine cerebrospinal fluid parameters nor IgM status was found with EDSS worsening.                                                                              |
| Gil-Perotin S, et al. <i>Combined Cerebrospinal Fluid Neurofilament Light Chain Protein and Chitinase-3 Like-1 Levels in Defining Disease Course and Prognosis in Multiple Sclerosis.</i> Front Neurol 2019 | Cross sectional cohort      | NR       | OCMBs    | 99 RRMS and 58 PPMS (28 and 41) | 2017                           | To investigate CSF Neurofilament Light Chain Protein and Chitinase-3 Like-1 levels in MS patients to evaluate the informative and prognostic potential of the individual and combined measures | In RRMS patients, CSF NFL and CHI3L1 levels correlated with each other ( $r = 0.58$ ), and with OCMBs ( $p = 0.02$ and $p = 0.004$ , respectively). In addition, CSF CHI3L1 concentration was a predictor for 1-point EDSS worsening {HR = 2.99 [95% CI (1.27, 7.07)]} and progression during follow-up {HR = 18 [95% CI (2.31, 141.3)]}.                                                                          |
| Huss A, et al. <i>Intrathecal immunoglobulin M production: A promising high-risk marker in clinically isolated syndrome patients.</i> Ann Neurol 2018                                                       | Prospectively acquired data | 88 Mo    | IgM Loc  | 126 CIS (34)                    | 2010                           | Conversion to CDMS                                                                                                                                                                             | The median conversion time for patients with ITMS was 10 months (95 % CI 3-17), 38 months (95 % CI 27-49), for patients without ITMS. The presence of IgM increased the risk of conversion to CDMS (HR = 2.4 95 % CI 1.2-4.6, $p=0.002$ ).                                                                                                                                                                         |
| Klein A, et al. <i>CSF parameters associated with early MRI activity in patients with MS.</i> Neurol Neuroimmunol Neuroinflammation 2019                                                                    | Retrospective cohort study  | 12 Mo    | IgM Loc  | 149 CIS/Early RRMS              | NR (first demyelinating event) | Risk of MRI progression                                                                                                                                                                        | Of the 20 patients with ITMS, 15 showed cMRI activity in the follow-up scan (OR 2.861, CI 0.993–9.572; $p = 0.064$ ). OCGBs were positively associated with the occurrence of cMRI activity after 12 months in the entire cohort (OR 1.855, CI 0.824–4.279; $p = 0.139$ ) and in particular in DMT– patients (9.327, CI 2.296–37.890; $p = 0.002$ ) but not DMT+ patients (OR 0.714, CI 0.260–1.960; $p = 0.513$ ) |
| Magraner MJ, et al. <i>Brain atrophy and lesion load are related to CSF lipid-specific IgM oligoclonal bands in clinically isolated syndromes.</i> Neuroradiology 2012                                      | Prospective cohort study    | 2 Yr     | LS-OCMBs | 24 CIS (36)                     | 2005                           | T2 lesion volume (T2LV) and brain atrophy                                                                                                                                                      | T2LV at the end of follow-up (year 2) was threefold higher in patients with LS-OCMB (3.95 cm <sup>3</sup> vs. 1.36 cm <sup>3</sup> , $p=0.001$ ). Brain atrophy was also higher in patients with LS-                                                                                                                                                                                                               |

|                                                                                                                                                                                                            |                             |          |                           |                                                |      |                                                                                                   |                                                                                                                                                                                                                                                                                                                                                                                                                                                                          |
|------------------------------------------------------------------------------------------------------------------------------------------------------------------------------------------------------------|-----------------------------|----------|---------------------------|------------------------------------------------|------|---------------------------------------------------------------------------------------------------|--------------------------------------------------------------------------------------------------------------------------------------------------------------------------------------------------------------------------------------------------------------------------------------------------------------------------------------------------------------------------------------------------------------------------------------------------------------------------|
|                                                                                                                                                                                                            |                             |          |                           |                                                |      |                                                                                                   | OCMB (BPF, 0.73 in LS-OCMB+ patients vs. 0.76 in negative ones, p=0.03).                                                                                                                                                                                                                                                                                                                                                                                                 |
| Mandrioli J, et al. <i>A multifactorial prognostic index in multiple sclerosis: Cerebrospinal fluid IgM oligoclonal bands and clinical features to predict the evolution of the disease.</i> J Neurol 2008 | Retrospective cohort study  | 10 Yr    | OCMBs                     | 64 RRMS and a validation group of 65 RRMS (28) | 2005 | Time to EDSS 3.0 and EDSS 4.0                                                                     | The probability of reaching an EDSS score of 3.0 or 4.0 was significantly influenced by the presence of OCMBs (p < 0.01 and p < 0.01, log-rank test) and by the symptoms at onset (p = 0.04 and p = 0.03, log-rank test). The presence of OCMBs and motor symptoms at onset significantly increased the risk of reaching EDSS 4.0 (HR = 5.65, CI = 1.86–17.16 and HR = 4.09, CI = 1.13–14.79, respectively)                                                              |
| Monreal E, et al. <i>Predicting Aggressive Multiple Sclerosis with Intrathecal IgM Synthesis Among Patients with a Clinically Isolated Syndrome.</i> Neurol Neuroimmunol Neuroinflammation 2021            | Prospectively acquired data | 12, 9 Yr | LS-OCMBs / OCMBs / IgMLoc | 193 CIS (31)                                   | 2017 | Risk of second relapse, EDSS 4.0, EDSS 6.0 and risk of conversion to SPMS.                        | Both OCMB and LS-OCMB were significantly associated with a higher risk of a second relapse (aHR 2.11, 95% CI 1.51–2.96, p < 0.001; and aHR 2.50, 95% CI 1.72–3.64, p < 0.001, respectively). The risk of EDSS 4.0 at the end of follow up was highest among LS-OCMBs patients (aHR 2.96, 95% CI 1.54–5.71; p = 0.001).                                                                                                                                                   |
| Oechtering J, et al. <i>Intrathecal Immunoglobulin M Synthesis is an Independent Biomarker for Higher Disease Activity and Severity in Multiple Sclerosis.</i> Ann Neurol 2021                             | Prospectively acquired data | 5,1 Yr   | IgM Loc                   | 530 CIS/RRMS (33)                              | 2017 | Risk and time to second relapse and disability accrual (MS severity score)                        | OCGB+/IgGIF+/IgMIF+ patients had a 94% higher risk of experiencing a second relapse (HR = 1.94, p< 0.01). OCGB+/IgGIF+/IgMIF+ patients had higher sNfLZ-scores when compared with patients without intrathecal immunoglobulin synthesis (OCGB/IgGIF/IgMIF; estimate 0.41 [CI0.04, 0.78],p=0.032). OCGB+/IgGIF+/IgMIF+ patients had, on average, 2.5 times more T2w lesions compared with patients without intrathecal immunoglobulin (RR = 2.53[CI 1.63, 3.93],p< 0.01). |
| Pfuhl C, et al. <i>Intrathecal IgM production is a strong risk factor for early conversion to multiple sclerosis.</i> Neurology 2019                                                                       | Prospective cohort study    | 2 Yr     | IgM Loc                   | 115 CIS and 35 early RRMS (33)                 | 2010 | Clinical (second relapse) or radiologic (new T2 or gadolinium enhancing lesions) conversion to MS | ITMS in patients with CIS was strongly associated with conversion to MS according to the McDonald 2010 criteria (HR = 3.05 [1.45–6.44], p = 0.003).                                                                                                                                                                                                                                                                                                                      |
| Schneider R, et al. <i>Intrathecal IgM-synthesis does not correlate with the risk of relapse in patients with a primary demyelinating event.</i> Eur J Neurol 2007                                         | Retrospective cohort study  | 60 mo    | OCMBs                     | 42 CIS (31)                                    | 2001 | Risk of second relapse and conversion to CDMS                                                     | There was no correlation between the presence of OCMBs, the number of bands or the IgM-Index and the risk of a relapse during the follow-up in the cohort studied.                                                                                                                                                                                                                                                                                                       |
| Schwenkenbecher P, et al. <i>Reiber's diagram for kappa free light chains: The new standard for assessing intrathecal synthesis?</i> Diagnostics 2019                                                      | Retrospective cohort study  | 50 Mo    | IgM Loc                   | 68 CIS and 100 RRMS (30-36)                    | 2017 | -                                                                                                 | Reiber's Kappa Free Light Chain diagram shows a great diagnostic performance to detect an intrathecal KFLC production in patients with MS.                                                                                                                                                                                                                                                                                                                               |
| Sola P, et al. <i>Primary progressive versus relapsing-onset multiple sclerosis: Presence and prognostic value of cerebrospinal fluid oligoclonal IgM.</i> Mult Scler J 2011                               | Retrospective cohort study  | 9 Yr     | OCMBs                     | 45 PPMS and 104 RRMS (48)                      | 2005 | Time to EDSS 3.0 and EDSS 4.0                                                                     | Considering the relapsing-onset group (RR and SPMS), the presence of OCMBs significantly increased the risk of                                                                                                                                                                                                                                                                                                                                                           |

|                                                                                                                                                                                 |                                                                       |          |          |                                                                                        |                  |                                                                                                                                                     |                                                                                                                                                                                                                                                                                   |
|---------------------------------------------------------------------------------------------------------------------------------------------------------------------------------|-----------------------------------------------------------------------|----------|----------|----------------------------------------------------------------------------------------|------------------|-----------------------------------------------------------------------------------------------------------------------------------------------------|-----------------------------------------------------------------------------------------------------------------------------------------------------------------------------------------------------------------------------------------------------------------------------------|
|                                                                                                                                                                                 |                                                                       |          |          |                                                                                        |                  |                                                                                                                                                     | progression to an EDSS of 4.0 (HR=2.35, CI=1.14–4.83, p = 0.02)                                                                                                                                                                                                                   |
| Tejeda-Velarde A, et al. <i>Clinical usefulness of prognostic biomarkers in optic neuritis</i> . Eur J Neurol 2018                                                              | Prospective cohort study                                              | 46, 4 Mo | LS-OCMBs | 68 Optic neuritis CIS (32)                                                             | 2010             | Risk of conversion to CDMS                                                                                                                          | LS-OCMB increased the risk of conversion to CDMS (HR = 116.6, CI = 13.4-1013, p = 0.002).                                                                                                                                                                                         |
| Thangarajh M, et al. <i>Lipid-specific immunoglobulin M in CSF predicts adverse long-term outcome in multiple sclerosis</i> . Mult Scler 2008                                   | Retrospective cohort study                                            | 11 Yr    | LS-OCMBs | 81 RRMS (31)                                                                           | 2001             | Risk of EDSS 4.0 and conversion to SPMS                                                                                                             | The median time to reach an EDSS score of 4.0 was 14 years in LS-OCMB group and 24 years in the negative group (P = 0.002; hazard ratio = 3.7 [95% CI, 2.3–17.9]).                                                                                                                |
| Villar LM, et al. <i>Immunoglobulin M oligoclonal bands: Biomarker of targetable inflammation in primary progressive multiple sclerosis</i> . Ann Neurol 2014                   | Cross-sectional cohort / Olympus PPMS cohort / validation cohort (23) | 7,4 yr   | OCMBs    | 80 PPMS in cross-sectional, 23 PPMS in Olympus and 67 in the international cohort (49) | 2001 and 2005    | Average MSSS score, prevalence of enhancing lesions, average number of enhancing lesions.                                                           | OCMB+ patients had, on average, a higher MSSS score (8.06 vs 6.47, p = 0.003), a higher average number of Gd enhancing lesions at baseline (p=0.0005) and a higher average number of new Gd enhancing lesions (1.09±0.35 for OCMB+ patients versus 0.17±0.14 for OCMB- patients). |
| Villar LM, et al. <i>Intrathecal IgM synthesis predicts the onset of new relapses and a worse disease course in MS</i> . Neurology 2002                                         | Prospective cohort study                                              | 21, 4 mo | OCMBs    | 21 RRMS 1 PPMS (28)                                                                    | Poser's criteria | Number of relapses; changes in the EDSS score                                                                                                       | Patients with OCMBs had more relapses (mean, 2.0) than those without (mean 0.58, p = 0.02). At the end of the study, patients with OCMBs had higher EDSS scores (mean, 1.70) than those without (mean, 0.79, p = 0.02).                                                           |
| Villar LM, et al. <i>Intrathecal IgM synthesis is a prognostic factor in multiple sclerosis</i> . Ann Neurol 2003                                                               | Retrospective cohort study                                            | 11 Yr    | OCMBs    | 29 RRMS (29)                                                                           | Poser's criteria | Probability of EDSS 6.0, EDSS at follow up, probability of conversion to SPMS, progression index, benign MS                                         | During the follow-up, 70.8% of patients with ITMS converted to SPMS. None of the patients without ITMS did. At the end of the study, 63.6% of patients with ITMS had reached EDSS 6.0, whereas none of the patients lacking ITMS reached values above EDSS 3.0.                   |
| Zeman D, et al. <i>Cerebrospinal fluid oligoclonal IgM test in routine practice: Comparison with quantitative assessment of intrathecal IgM synthesis</i> . Clin Chim Acta 2020 | Prospective cohort study                                              | NR       | OCMBs    | 4 CIS, 31 RRMS, 380 other diseases (NR)                                                | 2017             | To explore the relationship between different formulas and results of ITMS, and to assess the frequency of ITMS in an unselected series of samples. | Formulas for intrathecal IgM synthesis are specific (95%-97.6%) but insensitive (15%-26%) compared to oligoclonal IgM Bands. Authors propose to evaluate samples with 2 or 3 extra-CSF IgM bands as borderline and only samples with 4 or more as definitely positive             |

Supplementary Table S1. Summary of findings.

\* Mean or median

\*\*Patients with one clinical relapse fulfilling 2017 McDonald criteria

**Abbreviations:** CDMS = Clinically Definite MS; CI = Confidence Interval; CIS = Clinically Isolated Syndrome; CHI3L1 = Chitinase-3-like protein 1; CL = Cortical Lesions; CSF = CerebroSpinal Fluid; DE = Demyelinating Event; DMD(s) = Disease Modifying Drugs; EDSS = Expanded Disability Status Scale; GA = Glatiramer Acetate; GCIPL = Ganglion Cell plus Inner Plexiform Layer; HR = Hazard Ratio; IgMLoc = Intrathecal synthesized IgM > 0% assessed with Reiber formula; IF = Intrathecal Fraction; IFN = Interferon; ITMS = Intrathecal IgM synthesis; KFLC = Kappa Free Light Chain; LP = Lumbar Puncture; LS-OCMBs = Lipid-Specific OCMBs; Mo = months; MS = Multiple Sclerosis; NFL = Neurofilament; NR = Not reported; OCGBs = Oligoclonal IgG Bands; OCMBs = Oligoclonal IgM Bands; OR = Odd Ratio; pRNFL = peripapillary Retinal Nerve Fiber Layer; PPMS = Primary Progressive MS; RR = Relative Risk; RRMS = Relapsing-Remitting MS; SPMS = Secondary Progressive MS; WBC = white blood cell; Yr = year;

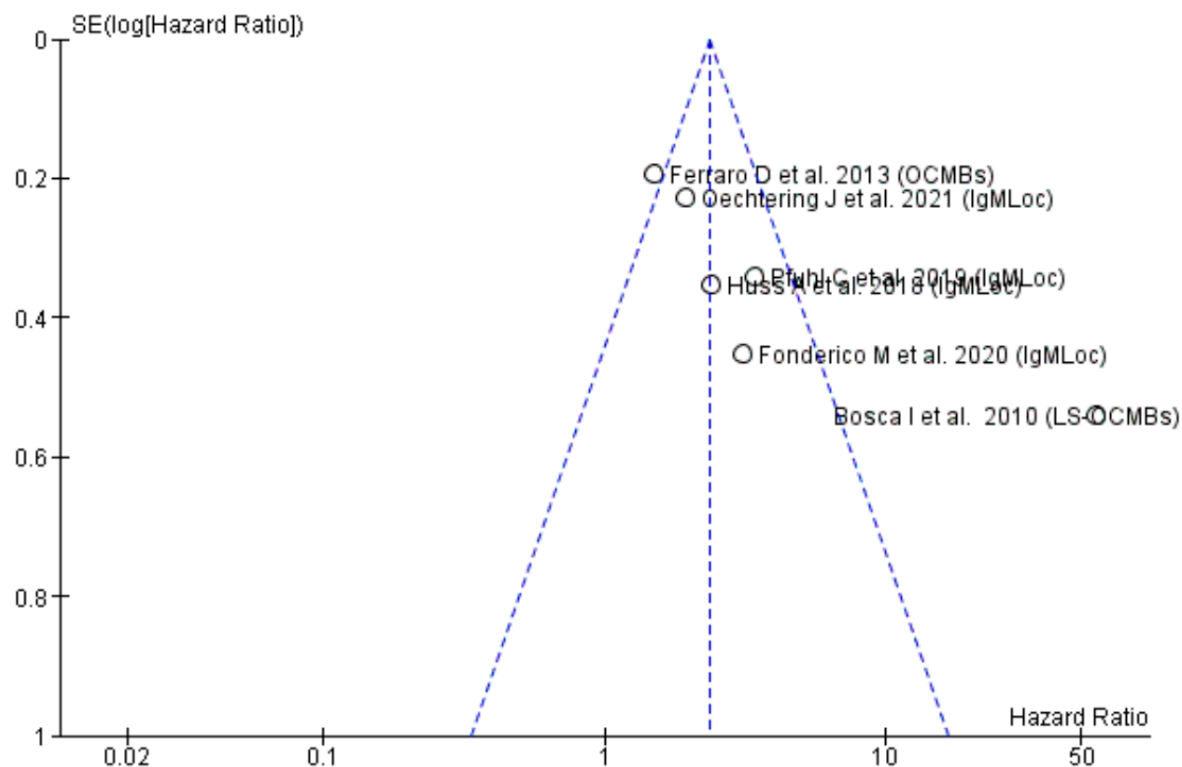

**Figure S1.** Forest plot for the risk of a second clinical relapse. Only studies with the same method of intrathecal IgM detection are analyzed.
